# Supplementary material for: Ag2O-decorated electrospun BiVO4 nanofibers with enhanced photocatalytic performance
Source: Royal Society of Chemistry journal article supplement (doi:10.1039/c9ra10952h), 2020-01-01
Supplement: c9ra10952h1.pdf [file c9ra10952h1.pdf]

Electronic Supplementary Information

*For*

**Ag<sub>2</sub>O decorated electrospun BiVO<sub>4</sub> nanofibers with photocatalytic performance  
enhancement**

Junpeng Ren, Yongyong Zhu

College of Weapons Engineering, Naval University of Engineering, Wuhan, 430033 China.

**Corresponding authors:**

**\*<sup>a</sup>Junpeng Ren, E-mail: [693301875@qq.com](mailto:693301875@qq.com)**

**\*<sup>a</sup>Yongyong Zhu, E-mail: [zyy99515@126.com](mailto:zyy99515@126.com)**

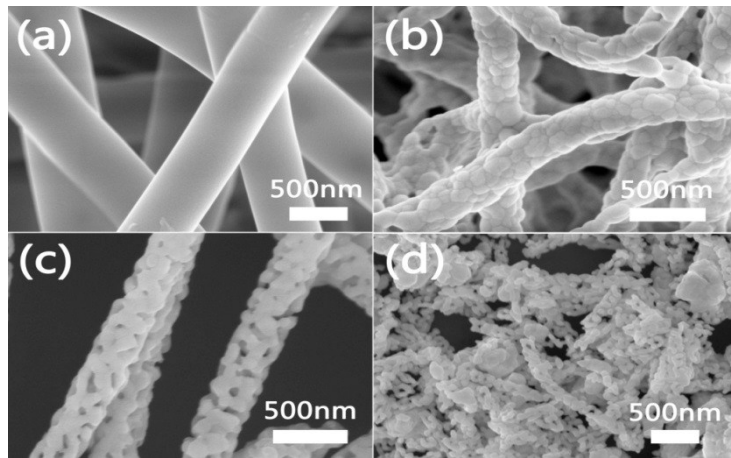

**Figure S1.** (a) SEM image of the  $\text{BiVO}_4$  electrospun precursor before calcination, (b-d) SEM image of the  $\text{BiVO}_4$  nanofibers calcinated at  $400^\circ\text{C}$ ,  $500^\circ\text{C}$  and  $600^\circ\text{C}$ .

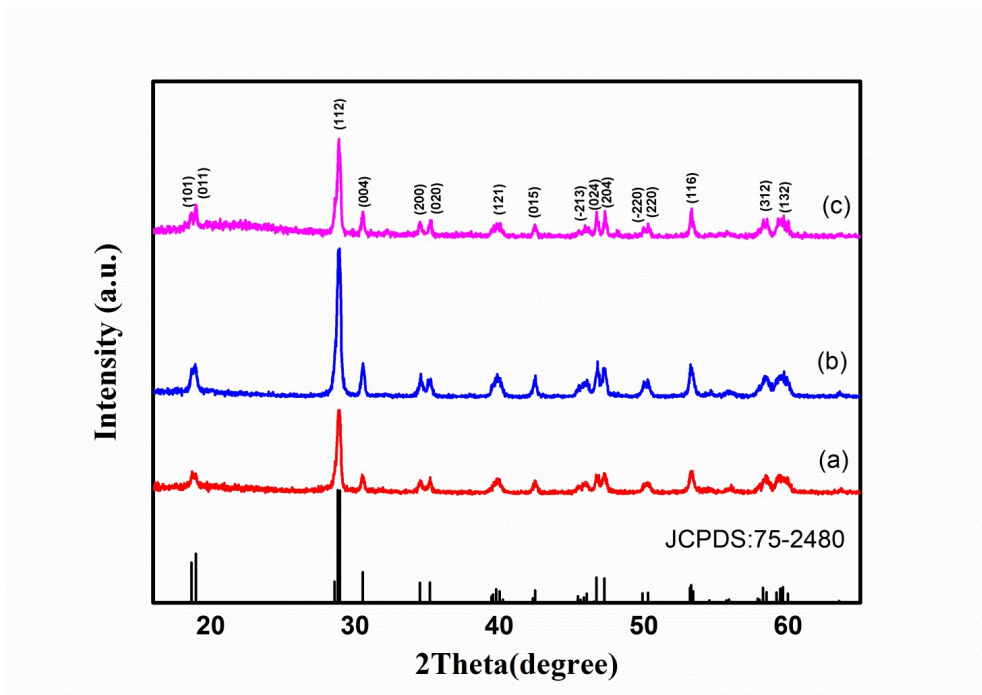

**Figure S2.** XRD patterns of BiVO<sub>4</sub> nanofibers calcinated at 400°C, 500°C and 600°C.

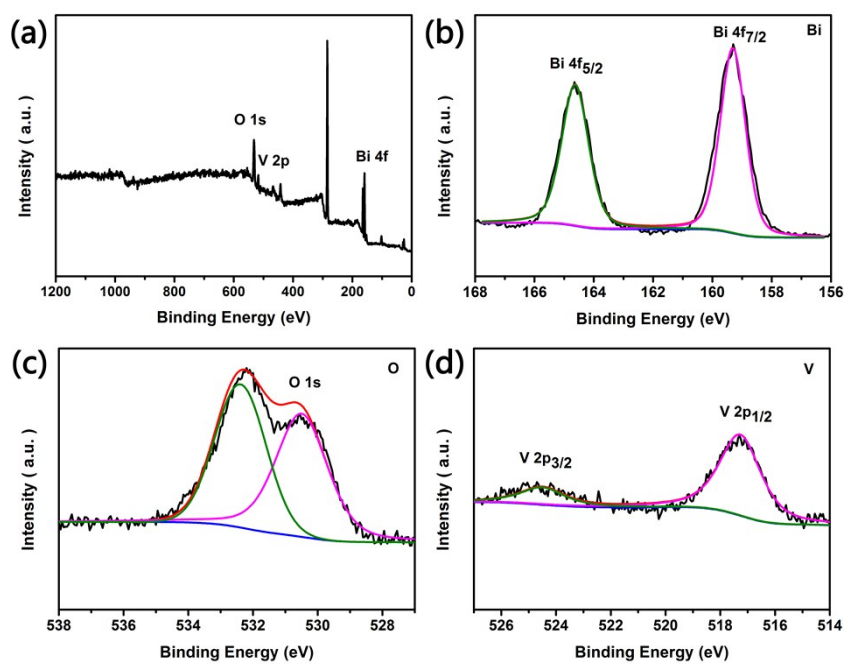

**Figure S3.** High resolution XPS spectra of pure BiVO<sub>4</sub> NFs: (a) full spectrum; (b) Bi 4f; (c) O 1s; (d) V 2p.

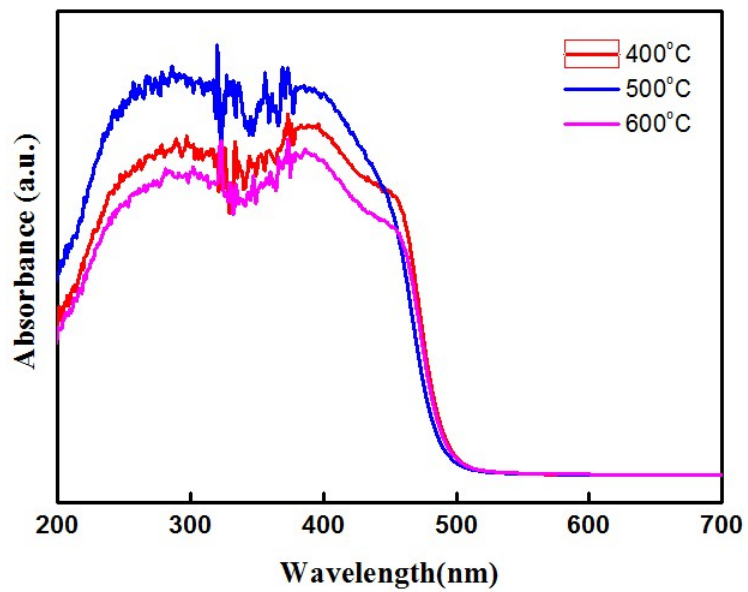

**Figure S4.** Diffuse reflectance UV-vis spectra of BiVO<sub>4</sub> nanofibers.

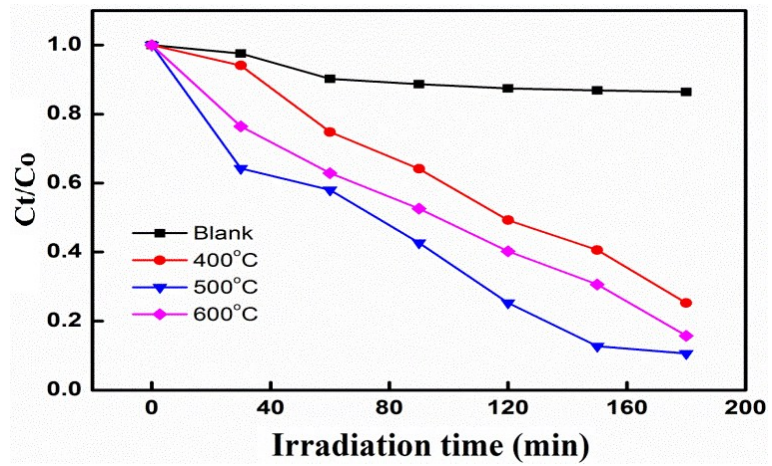

**Figure S5.** Photocatalytic activities of BiVO<sub>4</sub> nanofibers for the degradation rate of RhB under visible light.
